# Supplementary material for: Analysis of partially sulfonated low density polyethylene (LDPE) membranes as separators in microbial fuel cells
Source: Royal Society of Chemistry journal article supplement (doi:10.1039/c7ra02317k), 2017-01-01
Supplement: c7ra02317k1.pdf [file c7ra02317k1.pdf]

## **Supporting Information**

### **Analysis of partially sulfonated low density polyethylene (LDPE) membranes as separators in microbial fuel cells**

Vikash Kumar<sup>a</sup>, Ruchira Rudra<sup>b</sup>, Arpita Nandy<sup>b</sup>, Subrata Hait<sup>a\*</sup>, Patit P. Kundu<sup>b\*</sup>

<sup>a</sup> Department of Civil and Environmental Engineering, Indian Institute of Technology, Patna (Bihar), India.

<sup>b</sup> Advanced Polymer Laboratory, Department of Polymer Science and Technology, University of Calcutta, India.

Figure S1. FTIR analysis of cross-sectional LDPE membranes

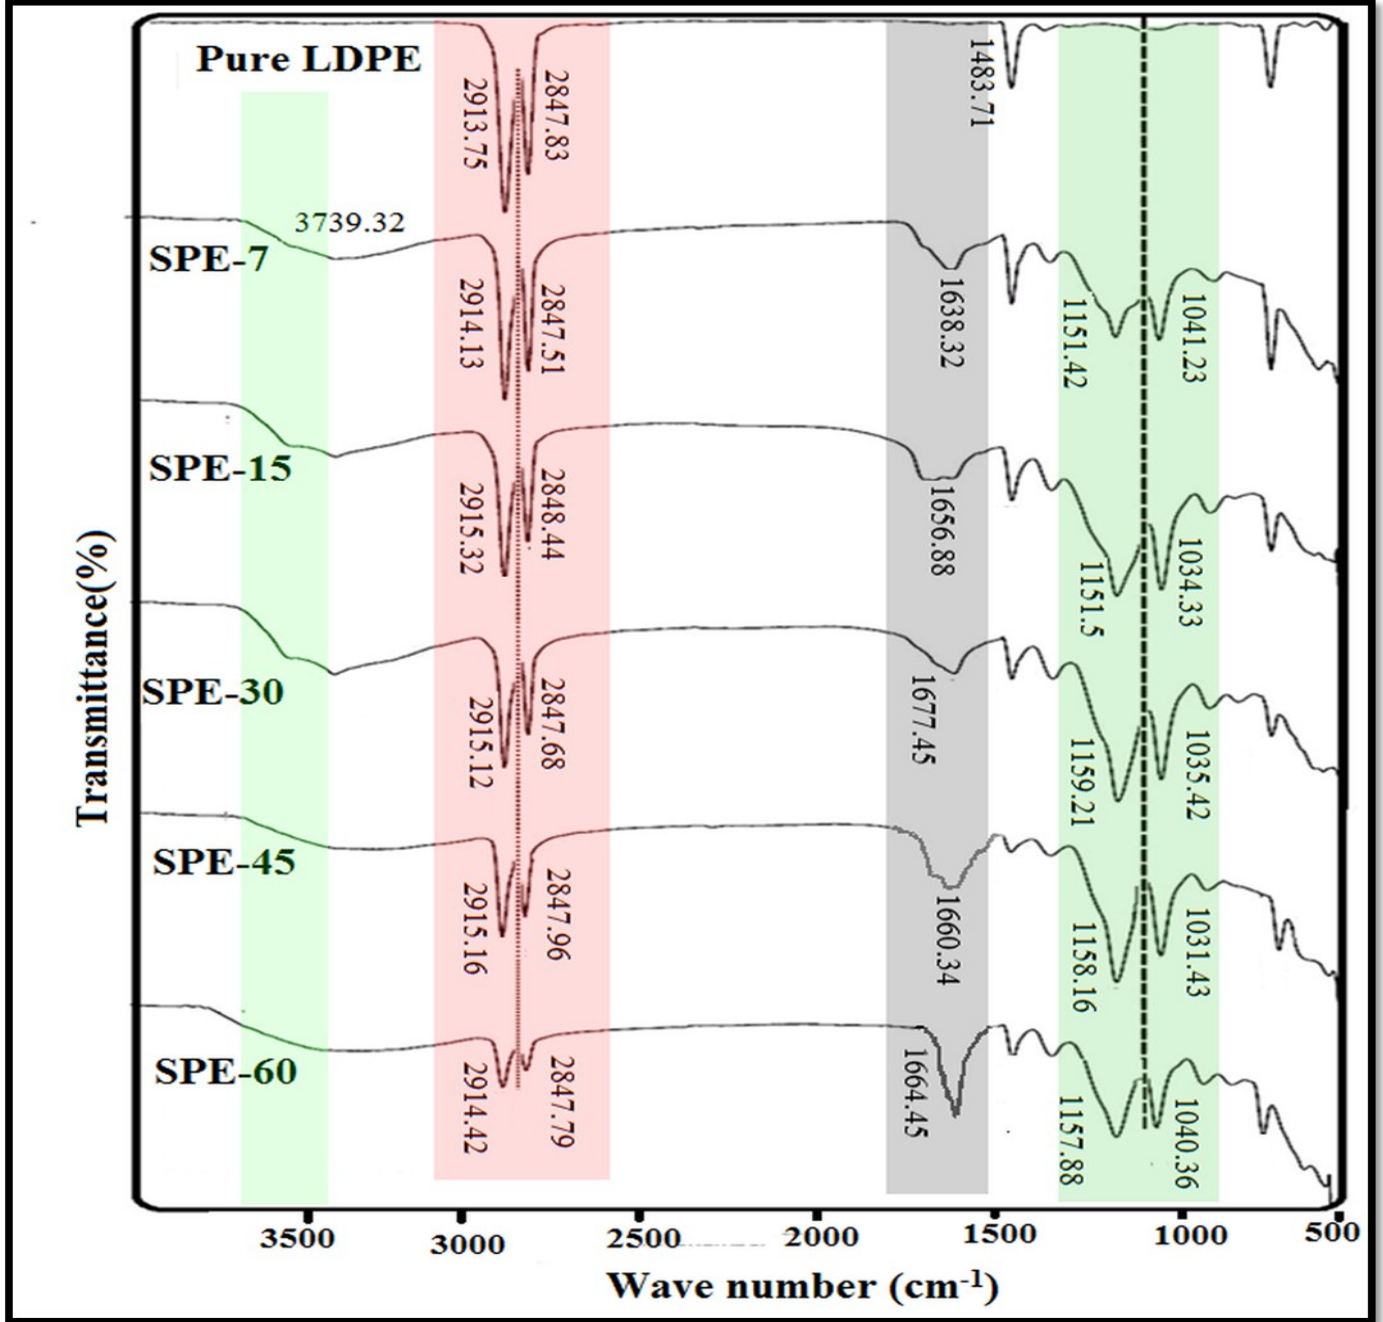

Figure S2: Cell performances at different resistances.

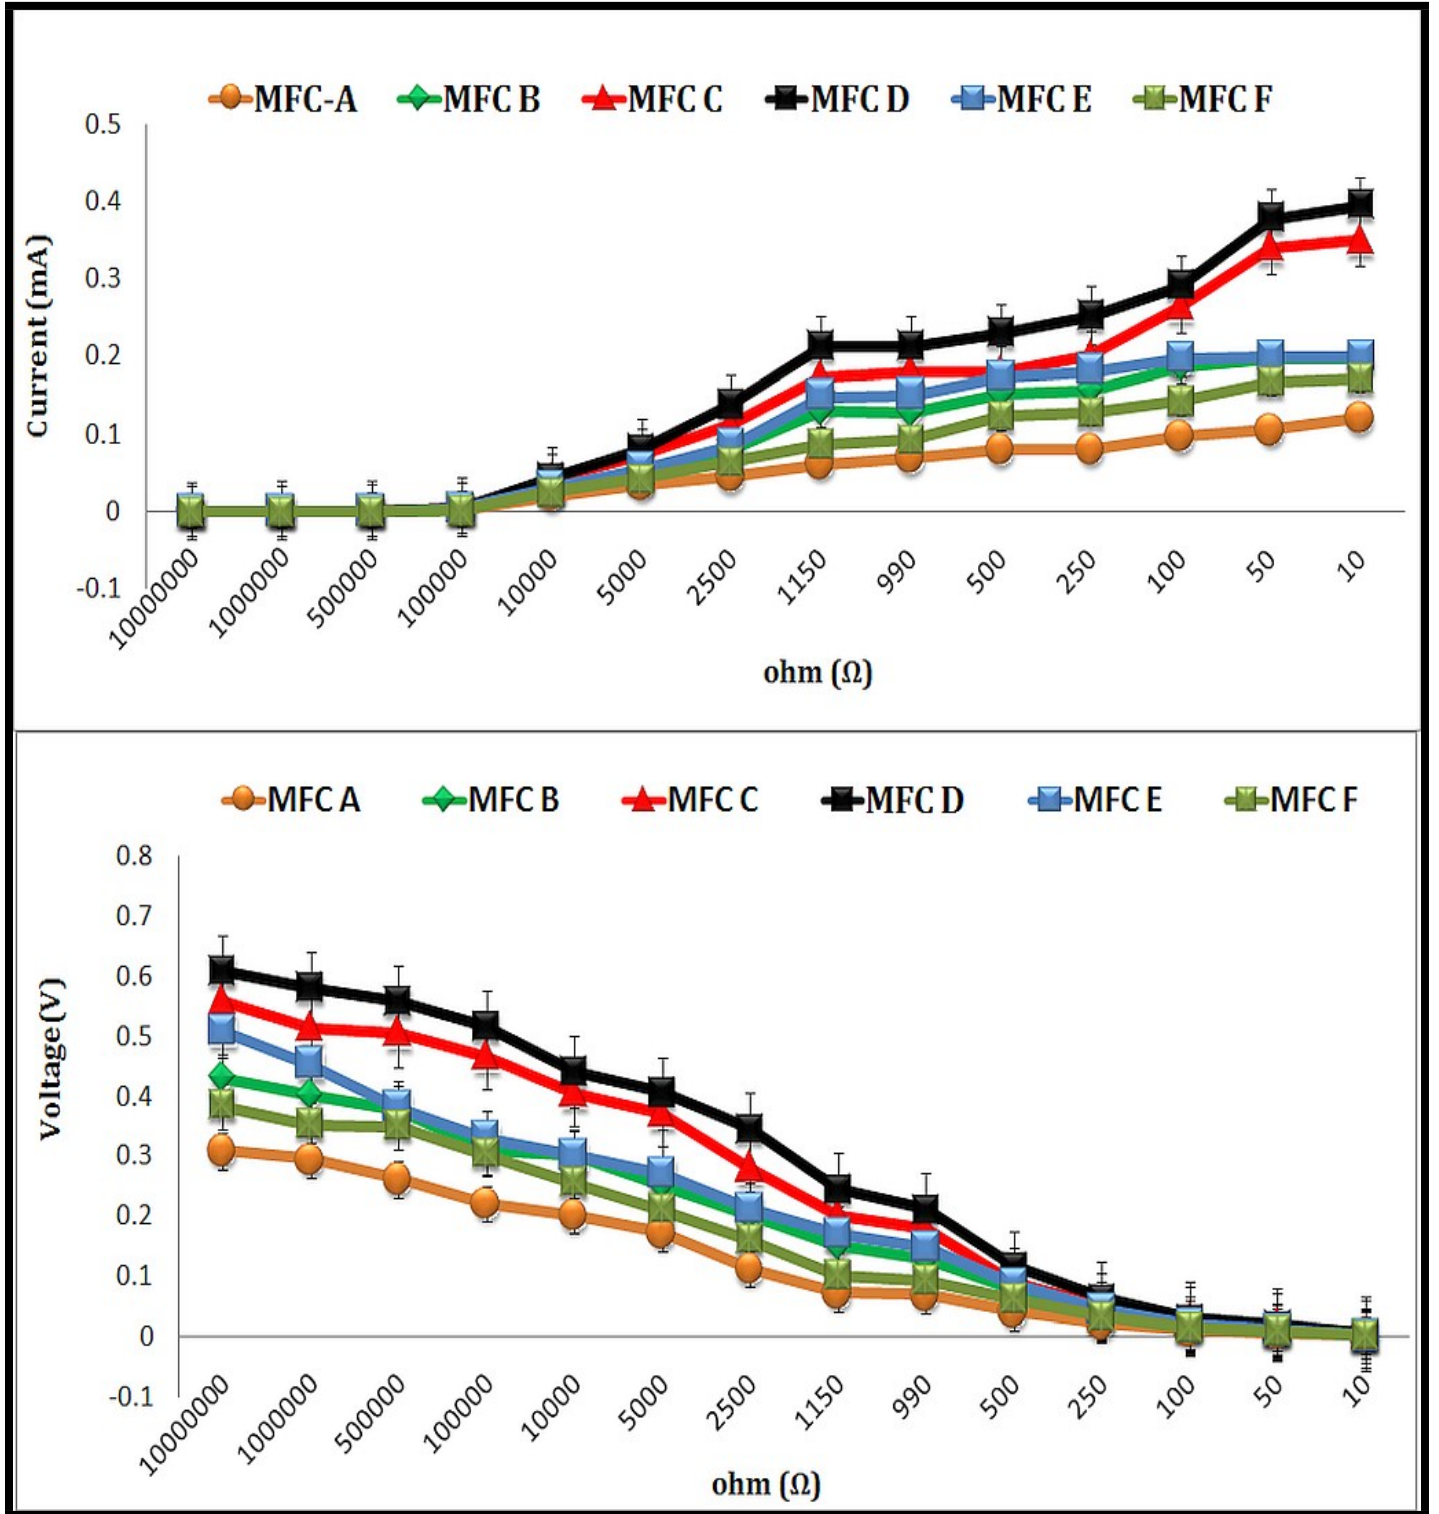

Figure S3: Polarization curve of SPE-30 fitted MFC with O<sub>2</sub> purging at cathode.

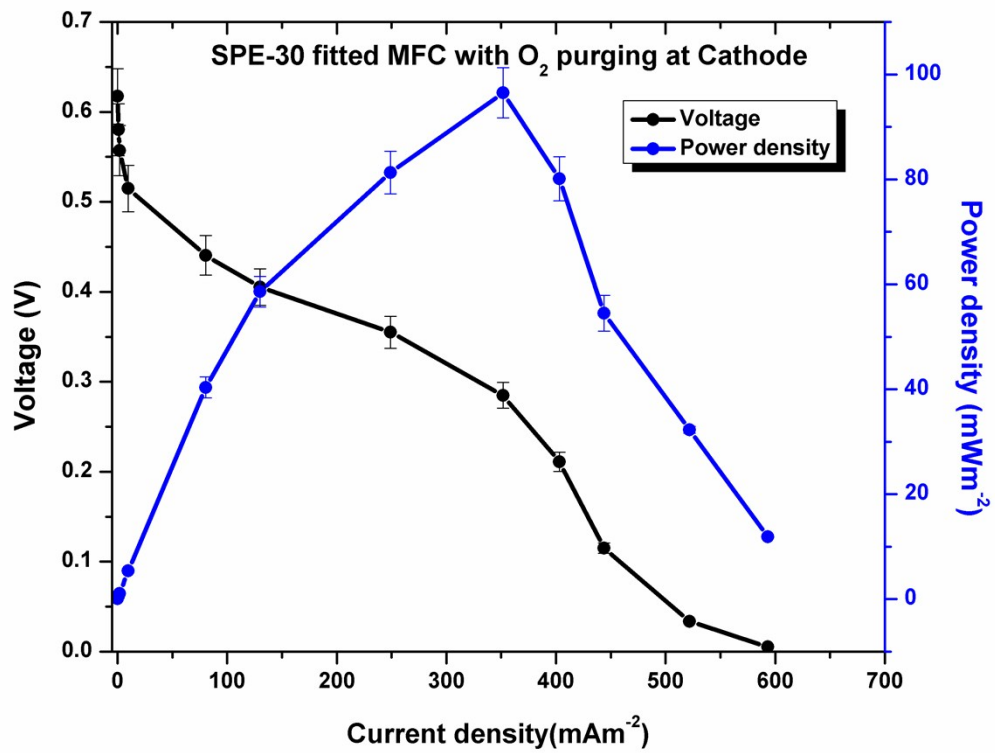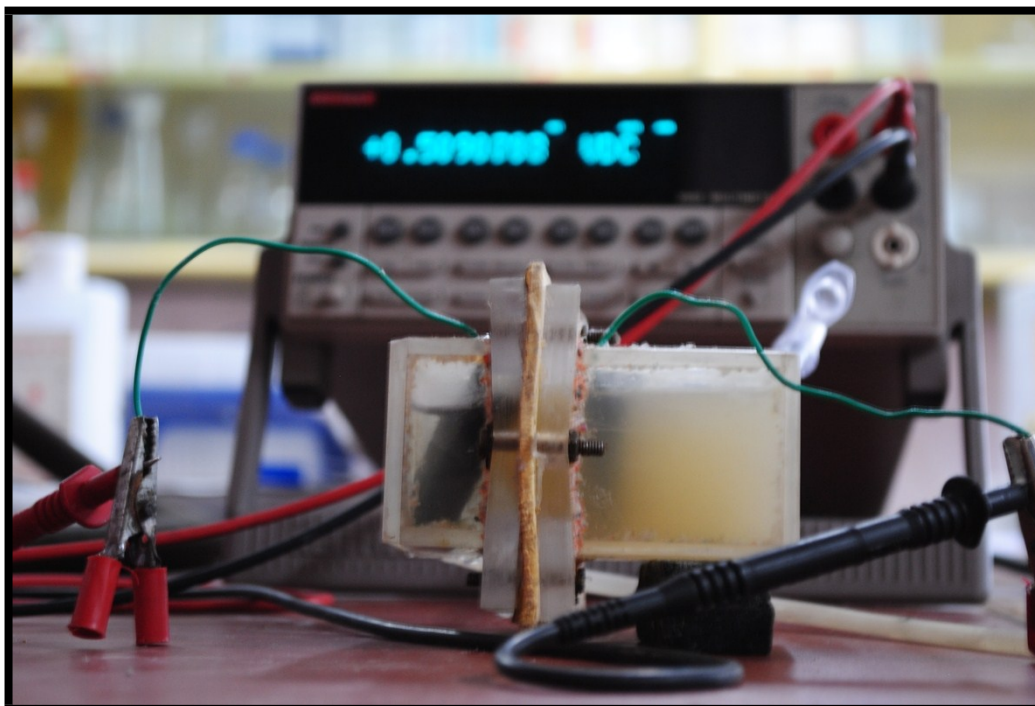

Figure S4: Schematic illustration representing the proton conductivity measurement of membranes.

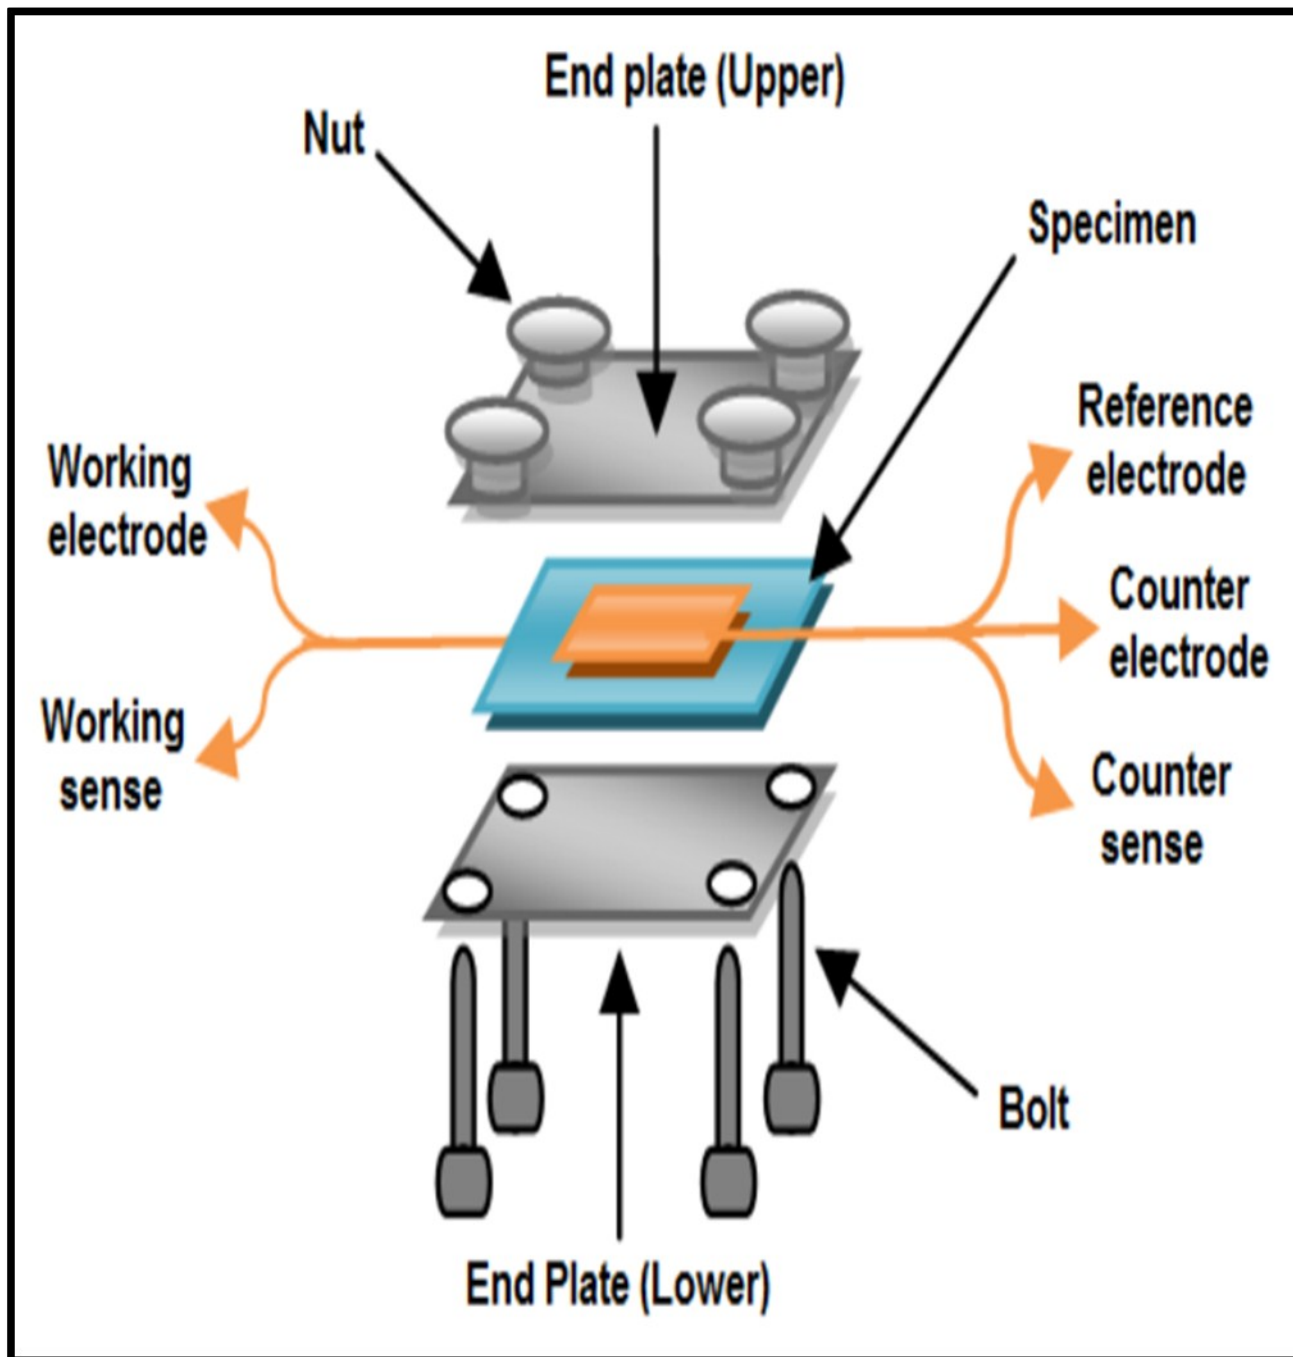

**Table 1(T1):** Differential Scanning Calorimetry (DSC) analysis of membranes.

| Sample Name      | Melt onset Temp (°C) | Melt peak Temp (°C) | Enthalpy(J/g) [ $\Delta H_f$ ] | % Crystallinity |
|------------------|----------------------|---------------------|--------------------------------|-----------------|
| <b>Pure LDPE</b> | 97.84                | 112.11              | 155.834                        | 53.166          |
| <b>SPE-7</b>     | 97.66                | 112.41              | 105.13                         | 35.87           |
| <b>SPE-15</b>    | 97.54                | 112.77              | 83.217                         | 28.4            |
| <b>SPE-30</b>    | 96.20                | 111.31              | 66.26                          | 22.6            |
| <b>SPE-45</b>    | 104.30               | 112.13              | 96.98                          | 33.6            |
| <b>SPE-1 hr</b>  | 105.1                | 112.45              | 143.47                         | 48              |

**Table 2 (T2):** A comparative study of MFCs in terms of power generation using different membranes

| <u>MFC Type</u> | <u>Electrodes</u>                                   | <u>Used Membranes</u>                                    | <u>Maximum Power density</u> | <u>References</u> |
|-----------------|-----------------------------------------------------|----------------------------------------------------------|------------------------------|-------------------|
| Dual chamber    | Composite electrodes (Stainless steel and Graphite) | Nafion 112                                               | 1.5 mWm <sup>-2</sup>        | 1                 |
| Air cathode MFC | Carbon papers                                       | Nafion 117                                               | 239.4 mWm <sup>-2</sup>      | 2                 |
| Air cathode MFC | Carbon papers                                       | SPEEK/PES                                                | 70 mWm <sup>-2</sup>         | 3                 |
| Dual chamber    | Graphite Plates                                     | Fe <sub>3</sub> O <sub>4</sub> /PES nanocomposite        | 20 mWm <sup>-2</sup>         | 4                 |
| Dual chamber    | Graphite Rods                                       | Sulfonated polyethylene/poly(styrene-co-divinyl benzene) | 44.1 mWm <sup>-2</sup>       | 5                 |
| Air cathode MFC | Carbon cloths                                       | Sulfonated polyethylene (as MEA)                         | 86.7 ± 5 mWm <sup>-2</sup>   | Present study     |

## References:

1. Godwin JM, Evitts RW, Kennell GF. Microbial fuel cell with a polypyrrole/poly(methylene blue) composite electrode. *Reports in electrochemistry* 2012; 2:3.
2. Lu N, Zhou SG, Zhuang L, Zhang JT, Ni JR. Electricity generation from starch processing wastewater using microbial fuel cell technology. *Biochem Eng J* 2009; 43:246–51.
3. Lim, S. S.; Daud, W. R. W.; Md Jahim, J.; Ghasemi, M.; Chong, P. S.; Ismail, M. Sulfonated Poly(ether Ether Ketone)/poly(ether Sulfone) Composite Membranes as an Alternative Proton Exchange Membrane in Microbial Fuel Cells. *International Journal of Hydrogen Energy* 2012, 37, 11409–11424.

4. Rahimnejad, M.; Ghasemi, M.; Najafpour, G. D.; Ismail, M.; Mohammad, A. W.; Ghoreyshi, A. A.; Hassan, S. H. A. Synthesis, Characterization and Application Studies of Self-made Fe<sub>3</sub>O<sub>4</sub>/PES Nanocomposite Membranes in Microbial Fuel Cell. *Electrochimica Acta* **2012**, *85*, 700–706.
5. Grzebyk, M.; Poźniak, G. Microbial Fuel Cells (MFCs) with Interpolymer Cation Exchange Membranes. *Separation and Purification Technology* **2005**, *41*, 321–32.



**Table 3(T3):** Cost comparison of membranes

| <b>Membranes</b>                 | <b>Costs (USD)</b>            |
|----------------------------------|-------------------------------|
| <b>Nafion</b>                    | ~1.8-2.3\$/cm <sup>2</sup>    |
| <b>AEMs(e.g., AMI 7001)</b>      | ~1.2-1.6\$/cm <sup>2</sup>    |
| <b>CEMs(e.g., CMI 7000)</b>      | ~0.6-1.2\$/cm <sup>2</sup>    |
| <b>Sulfonated LDPE membranes</b> | ~0.1-0.3\$/100cm <sup>2</sup> |

Figure S5: Membrane electrode assembly (MEA) in single chambered MFCs

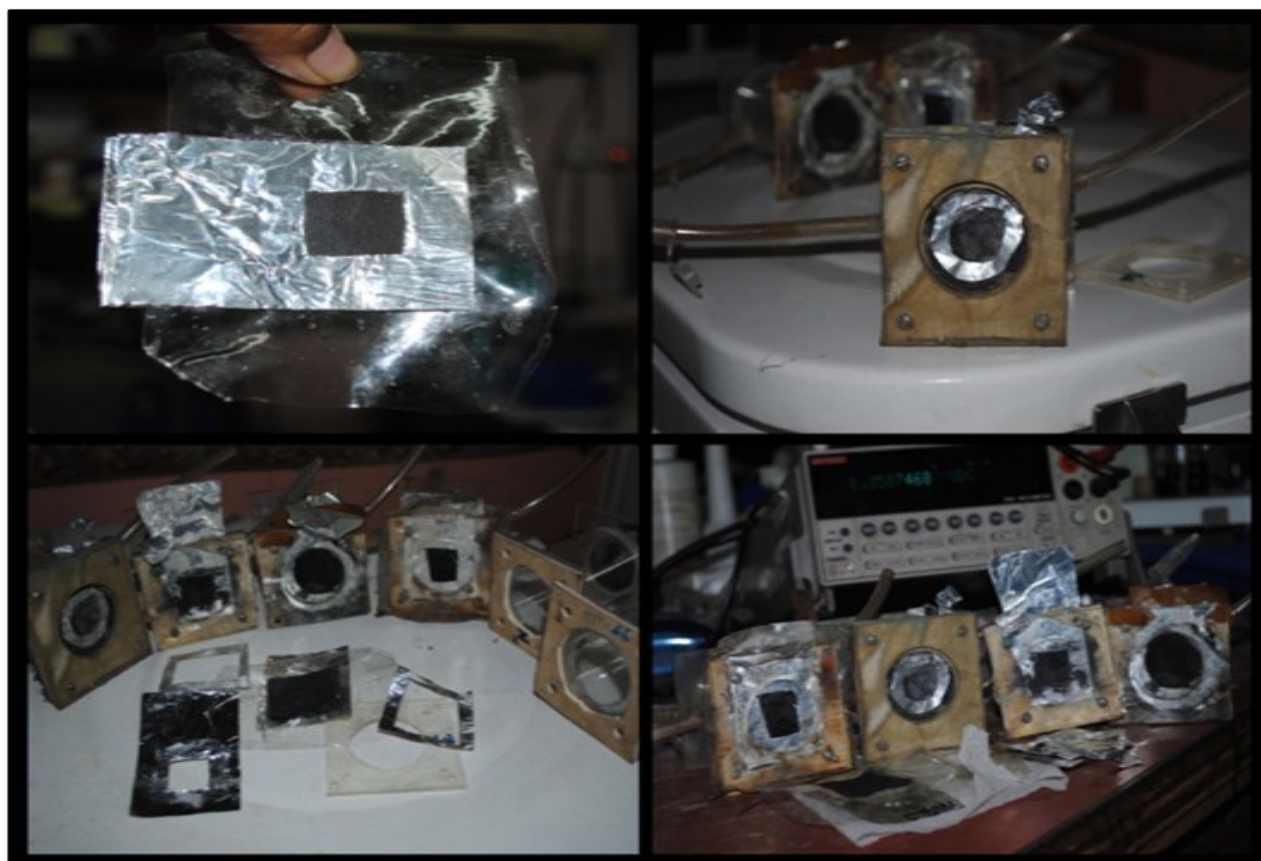

**Abbreviation/symbol**

**Description**

|                                |                                                                      |
|--------------------------------|----------------------------------------------------------------------|
| batch                          | Batch/fed-batch mode operation/process                               |
| continuous                     | Continuous flow mode process                                         |
| $t_{total}$                    | Total experimental duration                                          |
| $t_{max}$                      | Day of maximum performance                                           |
| $A_{an}$                       | Projected surface area of the anode                                  |
| $A_{cat}$                      | Projected surface area of the cathode                                |
| $A_{mem}$                      | Projected surface area of the membrane                               |
| ESA                            | Electrode surface area (projected)                                   |
| V                              | Total reactor volume                                                 |
| $V_{an}$                       | Total anolyte volume                                                 |
| $V_{cat}$                      | Total catholyte volume                                               |
| C                              | Substrate/product concentration                                      |
| $C_{in}/COD_{in}$              | Influent substrate/COD concentration                                 |
| $C_{out}/COD_{out}$            | Effluent substrate/COD concentration                                 |
| $\Delta C$ Or $\Delta COD$     | Substrate concentration change (Initial-final)                       |
| M                              | molar mass of the compound                                           |
| Ag/AgCl                        | Silver/Silver chloride reference electrode                           |
| SHE                            | Standard hydrogen electrode (reference electrode)                    |
| $E_{an}$                       | Anode potential                                                      |
| $E_{cat}$                      | Cathode potential                                                    |
| $E_{cell}$                     | Cell voltage                                                         |
| OCP                            | Open circuit potential                                               |
| I                              | Maximum current for batch process                                    |
| $I_{steady\ state}$            | Steady state current for continuous process                          |
| $R_{int}$                      | Internal resistance                                                  |
| $R_{ext}$                      | External resistance                                                  |
| $j_{ESA}$                      | Electrode surface based current density                              |
| $j_{Vol}$                      | Volumetric current density (w.r.t. $V_{an}/V_{cat}/V$ )              |
| P                              | Power                                                                |
| $\epsilon_C$                   | Coulombic efficiency                                                 |
| $\int I * dt$                  | Charge - Integration of current and time                             |
| F                              | Faraday's constant                                                   |
| $b_{es}$                       | Difference in degree of reduction between substrate and product      |
| $VFR_{influent}$               | Volumetric influent flow rate to the anode/cathode chamber           |
| HRT                            | Hydraulic retention time of anolyte/catholyte for continuous process |
| Ms/Mp                          | Moles of substrate used/product produced                             |
| $\Delta n_{product/substrate}$ | Moles of product produced/substrate used                             |

|                                         |                                                          |
|-----------------------------------------|----------------------------------------------------------|
| $Q_{\text{total}}$                      | Theoretical charge                                       |
| $Q_{\text{product(S)}}$                 | Charge recovered in the product(s)                       |
| $\epsilon_E$                            | Energetic efficiency                                     |
| $\Delta G_{\text{product}}$             | Energy content of product                                |
| $\Delta G_{\text{substrate}}$           | Energy content of substrate                              |
| $\Delta H$                              | Heat of combustion of the compound                       |
| $\int E_{\text{cell}} \cdot I \cdot dt$ | Power produced over time t                               |
| $P_{\text{vol}}$                        | Volumetric production rate (for product(s))              |
| $P_{\text{ESA}}$                        | Electrode surface based production rate (for product(s)) |
| $E_{p1}$                                | Energy content product 1                                 |
| $E_{p2}$                                | Energy content product 2                                 |

| Potential (in mV) of the routinely used reference electrodes vs SHE (at 25 °C) |                     |               |              |                               |  |
|--------------------------------------------------------------------------------|---------------------|---------------|--------------|-------------------------------|--|
| RE type                                                                        | E (mV)_Experimental | E (mV) vs SHE | E (V) vs SHE |                               |  |
| Ag/AgCl (0.1 M KCl)                                                            | 0                   | 288           | 0.288        |                               |  |
| Ag/AgCl (3.5 M KCl)                                                            | 0                   | 205           | 0.205        |                               |  |
| <b>Ag/AgCl (sat. KCl)</b>                                                      | <b>0</b>            | <b>199</b>    | <b>0.199</b> | <b>Used in the experiment</b> |  |
| Ag/AgCl (3 M NaCl)                                                             | 0                   | 209           | 0.209        |                               |  |
| Ag/AgCl (sat. NaCl)                                                            | 0                   | 197           | 0.197        |                               |  |
| Ag/AgCl (seawater)                                                             | 0                   | 250           | 0.25         |                               |  |
| SCE (0.1 M KCl)                                                                | 0                   | 336           | 0.336        |                               |  |
| SCE (1 M KCl)                                                                  | 0                   | 280           | 0.28         |                               |  |
| SCE (3.5 M KCl)                                                                | 0                   | 250           | 0.25         |                               |  |
| SCE (sat. KCl)                                                                 | 0                   | 244           | 0.244        |                               |  |
| SCE (sat. NaCl)                                                                | 0                   | 236           | 0.236        |                               |  |

# Microbial fuel cells (MFCs)

Green represents the system values

Red and Blue marked are not applicable here

COD value: 1800±240 mg l<sup>-1</sup>  
(total nitrogen: 114±27 mg l<sup>-1</sup>, PO<sub>4</sub>-P: 33±6 mg l<sup>-1</sup>, MgSO<sub>4</sub>:48 mg l<sup>-1</sup>).

Nature of process: Mixed substrate to electricity

| Parameter                                                | Units          | Formula                                             | Data and calculations |
|----------------------------------------------------------|----------------|-----------------------------------------------------|-----------------------|
| <b>SYSTEM CHARACTERISTICS</b>                            |                |                                                     |                       |
| Projected surface area of the anode ( $A_{an}$ )         | m <sup>2</sup> |                                                     | 0.0006                |
| Projected surface area of the cathode ( $A_{cat}$ )      | m <sup>2</sup> |                                                     | 0.0006                |
| Projected surface area of the membrane ( $A_{mem}$ )     | m <sup>2</sup> |                                                     | 0.0025                |
| Name of target product                                   |                |                                                     | Electricity           |
| Total reactor volume ( $V$ )                             | m <sup>3</sup> |                                                     | 0.00015               |
| Total anolyte volume ( $V_{an}$ ) for batch              | m <sup>3</sup> |                                                     | 0.00015               |
| Total anolyte volume ( $V_{an}$ ) for batch              | L              |                                                     | 0.15                  |
| Total catholyte volume ( $V_{cat}$ ) for batch           | m <sup>3</sup> |                                                     | NIL                   |
| Feed/flow rate (anolyte)                                 | L/d            |                                                     | 0.1                   |
| Hydraulic retention time (HRT of anolyte) for continuous | d              | $V_{an}/\text{feed rate}$ ; for example for anolyte | 1.5                   |
| Average distance between anode                           | m              |                                                     | 0                     |

and cathode

MEASURED  
PARAMETERS

|                                                                          |                |             |          |
|--------------------------------------------------------------------------|----------------|-------------|----------|
| Anode potential ( $E_{an}$ )                                             | V vs reference | Ag/AgCl     | -0.3     |
| Cathode potential ( $E_{cat}$ )                                          | V vs reference | Ag/AgCl     | 1        |
| Cell voltage ( $E_{cell}$ )                                              | V vs reference | Ag/AgCl     | 0.24     |
| Open circuit potential (OCP)                                             | V vs reference | Ag/AgCl     |          |
| Maximum oxidation current ( $I$ ) for batch                              | A              | as recorded | 0.000213 |
| Steady state current ( $I_{steady\ state}$ ) for continuous              | A              | as recorded | 0.0036   |
| Total experimental duration/days of current generation ( $t_{total}$ )   | days           |             | 7        |
| Internal resistance ( $R_{int}$ )                                        | $\Omega$       |             | 1        |
| External resistance ( $R_{ext}$ )                                        | $\Omega$       |             | 1        |
| Influent COD ( $COD_{in}$ )/Initial substrate concentration ( $C_{in}$ ) | g/L            |             | 1.8      |
| Effluent COD ( $COD_{out}$ )/Final substrate concentration ( $C_{out}$ ) | g/L            |             | 0.21     |

Note: For calculating charge (Q), consider EITHER average current over the total batch cycle ( $t_{total}$ ) OR area under the current curve i.e., Integration of  $I \times t$  relationship for  $t_{total}$

Note: For calculating charge (Q), consider EITHER average current over the total batch cycle ( $t_{total}$ ) OR area under the current curve i.e., Integration of  $I \times t$  relationship for  $t_{total}$

|                                             |                       |                                             |             |
|---------------------------------------------|-----------------------|---------------------------------------------|-------------|
| Wastewater treatment efficiency/COD removal | %                     | $((COD_{in} - COD_{out}) / COD_{in}) * 100$ | 88.33333333 |
| Organic loading rate                        | g <sub>COD</sub> /L.d | $(COD_{in} * feed rate) / Anolyte volume$   | 1.2         |

CALCULATED PARAMETERS

|                                                                                          |                  |                              |       |
|------------------------------------------------------------------------------------------|------------------|------------------------------|-------|
| Anode potential ( $E_{an}$ )                                                             | V vs SHE         | as calculated from tab sheet | -0.1  |
| Cathode potential ( $E_{cat}$ )                                                          | V vs SHE         | as calculated from tab sheet | 1.2   |
| Cell voltage ( $E_{cell}$ )                                                              | V vs SHE         | as calculated from tab sheet | 1.6   |
| Open circuit potential (OCP)                                                             | V vs SHE         | as calculated from tab sheet |       |
| Surface based current density ( $j_{ESA}$ ; w.r.t. $A_{an}$ ) for batch                  | A/m <sup>2</sup> | $I/A_{an}$                   | 0.355 |
| Volumetric current density ( $J_{vol}$ w.r.t. $V_{an}$ ) for batch                       | A/m <sup>3</sup> | $I/V_{an}$                   | 1.42  |
| Volumetric current density ( $J_{vol}$ w.r.t. $V$ ; total reactor volume) for batch      | A/m <sup>3</sup> | $I/V$                        | 1.42  |
| Surface based current density ( $j_{ESA}$ ; w.r.t. $A_{an}$ ) for continuous             | A/m <sup>2</sup> | $I_{steady state}/A_{an}$    | 6     |
| Volumetric current density ( $J_{vol}$ w.r.t. $V_{an}$ ) for continuous                  | A/m <sup>3</sup> | $I_{steady state}/V_{an}$    | 24    |
| Volumetric current density ( $J_{vol}$ w.r.t. $V$ ; total reactor volume) for continuous | A/m <sup>3</sup> | $I_{steady state}/V$         | 24    |

Note: where the system is operated with "working electrode" counter electrode potential is only valid when measured with second reference electrode

|                                                                                   |                  |                                      |            |
|-----------------------------------------------------------------------------------|------------------|--------------------------------------|------------|
| Power ( $P$ ) for batch/continuous                                                | W                | $E_{cell} * I$ or $I_{steady state}$ | 0.00005112 |
| Power density (w.r.t. $A_{an}$ ) for batch/continuous                             | W/m <sup>2</sup> | $P/A_{an}$                           | 0.0852     |
| Power density (w.r.t. $A_{cat}$ ) for batch/continuous                            | W/m <sup>2</sup> | $P/A_{cat}$                          | 0.0852     |
| Volumetric power density (w.r.t. $V$ ; total reactor volume) for batch/continuous | W/m <sup>3</sup> | $P/V$                                | 0.3408     |
